# Supplementary material
Source: PubMed Central journal article supplement (PMC6880864)
Supplement: NIHMS1058273-supplement-2.pdf [file NIHMS1058273-supplement-2.pdf]

| Species                 | Voucher | Locality                                            | Latitude | Longitude | Seq Type | Primers            | GenBank  |
|-------------------------|---------|-----------------------------------------------------|----------|-----------|----------|--------------------|----------|
| Metanonychus oregonus   | OP1706  | OR: Lane Co. Clark Creek Organizational Campground  | 43.9725  | -122.5793 | Sanger   | 1718s/2776s        | MN125383 |
| Metanonychus idahoensis | OP1719  | ID: Shoshone Co., Hobo Cedar Grove Botanical Area   | 47.088   | -116.1152 | Sanger   | PMT1/2776s         | MN125406 |
| Metanonychus oregonus   | OP1966  | OR: Lane Co. Clark Creek Organizational Campground  | 43.9725  | -122.5793 | Sanger   |                    | HM056733 |
| Metanonychus mechanicus | OP2016  | OR: Clatsop Co., Saddle Mountain State Natural Area | 45.9612  | -123.6877 | Sanger   | 1718s/2776s        | MN125463 |
| Metanonychus idahoensis | OP2427  | ID: Clearwater Co., tributary of Orogrande Creek    | 46.5836  | -115.6164 | Sanger   | PMT1/2776s         | MN125411 |
| Metanonychus idahoensis | OP2429  | ID: Clearwater Co., FS 734 0.6 mi from FS 255       | 46.7986  | -115.1226 | Sanger   | 1718s/2776s        | MN125410 |
| Metanonychus idahoensis | OP2432  | ID: Shohone Co., Eagle Creek                        | 47.2122  | -115.5484 | Sanger   | PMT1/2776s         | MN125402 |
| Metanonychus idahoensis | OP2432  | ID: Shohone Co., Eagle Creek                        | 47.2122  | -115.5484 | UCE      |                    | MN125403 |
| Metanonychus idahoensis | OP2434  | ID: Clearwater Co., FS 535 4.0 mi NE of FS 100      | 46.394   | -115.7216 | Sanger   | 1718s/2776s        | MN125404 |
| Metanonychus idahoensis | OP2435  | ID: Clearwater Co., FS 535 4.0 mi NE of FS 100      | 46.394   | -115.7216 | UCE      |                    | MN125405 |
| Metanonychus idahoensis | OP2436  | ID: Clearwater Co., tributary of Kelly Creek        | 47.2122  | -115.5484 | Sanger   | PMT1/2776s         | MN125408 |
| Metanonychus idahoensis | OP2438  | ID: Clearwater Co., tributary of Kelly Creek        | 47.2122  | -115.5484 | UCE      |                    | MN125409 |
| Metanonychus idahoensis | OP2756  | ID: Shoshone Co., Hobo Cedar Grove Botanical Area   | 47.088   | -116.1152 | UCE      |                    | MN125407 |
| Metanonychus setulus    | OP3387  | OR: Benton Co., Mary's Peak Road                    | 44.4964  | -123.5457 | Sanger   | 1718s + PMT1/2776s | MN125482 |
| Metanonychus mechanicus | OP3403  | OR: Clatsop Co., Fort Stevens State Park            | 46.1893  | -123.9704 | Sanger   | PMT1/2776s         | MN125452 |
| Metanonychus mechanicus | OP3404  | OR: Clatsop Co., Fort Stevens State Park            | 46.1893  | -123.9704 | UCE      |                    | MN125453 |
| Metanonychus cascadius  | OP3410  | OR: Clackamas Co., Wildwood Recreational Site       | 45.3522  | -121.9929 | Sanger   | 1718s/2776s        | MN125425 |
| Metanonychus cascadius  | OP3429  | OR: Multnomah Co., Forest Park                      | 45.5922  | -122.7898 | Sanger   | 1718s/2776s        | MN125418 |
| Metanonychus cascadius  | OP3430  | OR: Multnomah Co., Forest Park                      | 45.5922  | -122.7898 | UCE      |                    | MN125419 |
| Metanonychus cascadius  | OP3447  | OR: Clackamas Co., 2.3 mi SE Rhododendron           | 45.301   | -121.896  | Sanger   | PMT1/2776s         | MN125424 |
| Metanonychus cascadius  | OP3449  | OR: Clackamas Co., 2.3 mi SE Rhododendron           | 45.301   | -121.896  | UCE      |                    | MN125423 |
| Metanonychus mechanicus | OP3455  | OR: Tillamook Co., Neahkahnie Mountain Trail        | 45.745   | -123.9503 | Sanger   | co1-1head/2568     | MN125458 |
| Metanonychus cascadius  | OP3463  | OR: Marion Co., Opal Creek Ancient Forest           | 44.8463  | -122.2079 | Sanger   | PMT1/2776s         | MN125421 |
| Metanonychus cascadius  | OP3465  | OR: Marion Co., Opal Creek Ancient Forest           | 44.8463  | -122.2079 | UCE      |                    | MN125422 |
| Metanonychus mechanicus | OP3478  | OR: Clatsop Co., Ecola State Park                   | 45.9234  | -123.9733 | Sanger   | PMT1/2776s         | MN125448 |
| Metanonychus oregonus   | OP3511  | OR: Tillamook Co., Farmer Creek Road                | 45.2543  | -123.8821 | Sanger   | PMT1/2776s         | MN125389 |
| Metanonychus oregonus   | OP3544  | OR: Lane Co. Clark Creek Organizational Campground  | 43.9725  | -122.5793 | Sanger   | PMT1/2776s         | MN125384 |
| Metanonychus navarrus   | OP3695  | CA: Mendocino Co., Van Damme State Park             | 39.277   | -123.7779 | Sanger   | PMT1/2776s         | MN125416 |
| Metanonychus navarrus   | OP3695  | CA: Mendocino Co., Van Damme State Park             | 39.277   | -123.7779 | UCE      |                    | MN125417 |

| Species                | Voucher | Locality                                         | Latitude | Longitude | Seq Type | Primers       | GenBank  |
|------------------------|---------|--------------------------------------------------|----------|-----------|----------|---------------|----------|
| Metanonychus navarrus  | OP3696  | CA: Humboldt Co., Skunk Cabbage                  | 40.307   | -124.0569 | Sanger   | PMT1/2776s    | MN125414 |
| Metanonychus navarrus  | OP3697  | CA: Humboldt Co., Skunk Cabbage                  | 40.307   | -124.0569 | UCE      |               | MN125415 |
| Metanonychus nigricans | OP3698  | CA: Humboldt Co., Skunk Cabbage                  | 40.307   | -124.0569 | Sanger   | PMT1/2776s    | MN125379 |
| Metanonychus nigricans | OP3699  | CA: Humboldt Co., Skunk Cabbage                  | 40.307   | -124.0569 | UCE      |               | MN125380 |
| Metanonychus nigricans | OP3700  | CA: Del Norte Co., N False Klamath Cove          | 41.6562  | -124.1165 | Sanger   | PMT1/2776s    | MN125376 |
| Metanonychus nigricans | OP3701  | CA: Del Norte Co., N False Klamath Cove          | 41.6562  | -124.1165 | UCE      |               | MN125375 |
| Metanonychus nigricans | OP3702  | CA: Del Norte Co., S of Fort Dick                | 41.8478  | -124.1595 | Sanger   | PMT1/2776s    | MN125378 |
| Metanonychus nigricans | OP3704  | CA: Del Norte Co., S of Fort Dick                | 41.8478  | -124.1595 | UCE      |               | MN125377 |
| Metanonychus mazamus   | OP3705  | OR: Josephine Co., Board Tree Creek              | 42.705   | -123.3280 | Sanger   | PMT1/2776s    | MN125428 |
| Metanonychus mazamus   | OP3707  | OR: Josephine Co., Board Tree Creek              | 42.705   | -123.3280 | UCE      |               | MN125429 |
| Metanonychus mazamus   | OP3708  | OR: Douglas Co., S of Drew                       | 42.8414  | -122.8509 | Sanger   | PMT1/2776s    | MN125443 |
| Metanonychus oregonus  | OP3710  | OR: Curry Co., Lobster Creek Road                | 42.5094  | -124.2948 | Sanger   | PMT1/2776s    | MN125397 |
| Metanonychus mazamus   | OP3711  | OR: Curry Co., Lobster Creek Road                | 42.5094  | -124.2948 | Sanger   | co1-1hed/2568 | MN125437 |
| Metanonychus setulus   | OP3713  | OR: Curry Co., E of Cape Sebastian State Park    | 42.3316  | -124.4106 | Sanger   | PMT1/2776s    | MN125470 |
| Metanonychus setulus   | OP3713  | OR: Curry Co., E of Cape Sebastian State Park    | 42.3316  | -124.4106 | UCE      |               | MN125471 |
| Metanonychus mazamus   | OP3715  | OR: Curry Co., E of Cape Sebastian State Park    | 42.3316  | -124.4106 | UCE      |               | MN125431 |
| Metanonychus setulus   | OP3716  | OR: Curry Co., Humbug Mountain State Park        | 42.6872  | -124.4356 | Sanger   | PMT1/2776s    | MN125478 |
| Metanonychus setulus   | OP3717  | OR: Curry Co., Humbug Mountain State Park        | 42.6872  | -124.4356 | UCE      |               | MN125479 |
| Metanonychus setulus   | OP3718  | OR: Curry Co., along Sixes River                 | 42.8048  | -124.3252 | Sanger   | PMT1/2776s    | MN125486 |
| Metanonychus oregonus  | OP3720  | OR: Coos Co., Laverne County Park                | 43.2602  | -124.0299 | Sanger   | PMT1          | MN125396 |
| Metanonychus setulus   | OP3721  | OR: Coos Co., Laverne County Park                | 43.2602  | -124.0299 | Sanger   | PMT1/2776s    | MN125481 |
| Metanonychus oregonus  | OP3723  | OR: Coos Co., Golden and Silver Falls State Park | 43.4821  | -123.9333 | Sanger   | co1-1hed/2568 | MN125391 |
| Metanonychus setulus   | OP3724  | OR: Coos Co., Golden and Silver Falls State Park | 43.4821  | -123.9333 | Sanger   | 2776s         | MN125475 |
| Metanonychus setulus   | OP3726  | OR: Douglas Co., E of Reedsport                  | 43.6919  | -123.995  | Sanger   | PMT1/2776s    | MN125473 |
| Metanonychus setulus   | OP3728  | OR: Douglas Co., E of Reedsport                  | 43.6919  | -123.995  | UCE      |               | MN125474 |
| Metanonychus setulus   | OP3729  | OR: Lane Co., Honeyman State Park                | 43.9302  | -124.1086 | Sanger   | PMT1/2776s    | MN125476 |
| Metanonychus setulus   | OP3731  | OR: Lane Co., Honeyman State Park                | 43.9302  | -124.1086 | UCE      |               | MN125477 |
| Metanonychus oregonus  | OP3732  | OR: Lane Co., East Mapleton Road                 | 44.0597  | -123.8846 | Sanger   | PMT1/2776s    | MN125385 |
| Metanonychus setulus   | OP3734  | OR: Lane Co., East Mapleton Road                 | 44.0597  | -123.8846 | Sanger   | PMT1/2776s    | MN125472 |

| Species                 | Voucher | Locality                                              | Latitude | Longitude | Seq Type | Primers            | GenBank  |
|-------------------------|---------|-------------------------------------------------------|----------|-----------|----------|--------------------|----------|
| Metanonychus setulus    | OP3736  | OR: Lane Co., Cape Creek Road                         | 44.1295  | -124.101  | Sanger   | PMT1/2776s         | MN125469 |
| Metanonychus oregonus   | OP3738  | OR: Lincoln Co., Canal Creek                          | 44.3718  | -123.9248 | Sanger   | PMT1/2776s         | MN125381 |
| Metanonychus setulus    | OP3740  | OR: Lincoln Co., Canal Creek                          | 44.3718  | -123.9248 | Sanger   | PMT1/2776s         | MN125468 |
| Metanonychus setulus    | OP3744  | OR: Benton Co., road to Mary's Peak                   | 44.4962  | -123.5454 | UCE      |                    | MN125483 |
| Metanonychus oregonus   | OP3746  | OR: Benton Co., road to Mary's Peak                   | 44.4962  | -123.5454 | Sanger   | PMT1/2776s         | MN125398 |
| Metanonychus setulus    | OP3747  | OR: Lincoln Co., Hwy 20, NW Toledo                    | 44.676   | -123.8741 | Sanger   | PMT1/2776s         | MN125485 |
| Metanonychus setulus    | OP3748  | OR: Lincoln Co., Hwy 20, NW Toledo                    | 44.676   | -123.8741 | UCE      |                    | MN125484 |
| Metanonychus oregonus   | OP3750  | OR: Lincoln Co., Hwy 229, Siltz River                 | 44.8001  | -123.9048 | Sanger   | PMT1/2776s         | MN125399 |
| Metanonychus mechanicus | OP3752  | OR: Lincoln Co., Fogarty Creek State Park             | 44.8375  | -124.0503 | Sanger   | PMT1/2776s         | MN125450 |
| Metanonychus mechanicus | OP3754  | OR: Lincoln Co., Fogarty Creek State Park             | 44.8375  | -124.0503 | UCE      |                    | MN125451 |
| Metanonychus mechanicus | OP3755  | OR: Lincoln Co., HB Van Duzer Forest Corridor Wayside | 45.0385  | -123.8088 | Sanger   | PMT1/2776s         | MN125454 |
| Metanonychus mechanicus | OP3756  | OR: Lincoln Co., HB Van Duzer Forest Corridor Wayside | 45.0385  | -123.8088 | UCE      |                    | MN125455 |
| Metanonychus oregonus   | OP3758  | OR: Tillamook Co., Farmer Creek Road                  | 45.2543  | -123.8821 | Sanger   | PMT1/2776s         | MN125390 |
| Metanonychus oregonus   | OP3759  | OR: Tillamook Co., Farmer Creek Road                  | 45.2543  | -123.8821 | UCE      |                    | MN125388 |
| Metanonychus oregonus   | OP3761  | OR: Tillamook Co., road to Elk Creek Campground       | 45.6081  | -123.4617 | Sanger   | 1718s + PMT1/2776s | MN125386 |
| Metanonychus oregonus   | OP3762  | OR: Tillamook Co., road to Elk Creek Campground       | 45.6081  | -123.4617 | UCE      |                    | MN125387 |
| Metanonychus mechanicus | OP3763  | OR: Tillamook Co., road to Elk Creek Campground       | 45.6081  | -123.4617 | Sanger   | PMT1/2776s         | MN125449 |
| Metanonychus oregonus   | OP3764  | OR: Tillamook Co., along Wilson River                 | 45.4914  | -123.6346 | Sanger   | PMT1/2776s         | MN125400 |
| Metanonychus mechanicus | OP3765  | OR: Tillamook Co., along Wilson River                 | 45.4914  | -123.6346 | Sanger   | PMT1/2776s         | MN125466 |
| Metanonychus mechanicus | OP3767  | OR: Tillamook Co., nr Nehalem Falls Campground        | 45.7299  | -123.7687 | Sanger   | co1-1hed/2568      | MN125459 |
| Metanonychus mechanicus | OP3770  | OR: Tillamook Co., Neahkahnie Beach Road              | 45.7243  | -123.9288 | Sanger   | PMT1/2776s         | MN125457 |
| Metanonychus mechanicus | OP3771  | OR: Tillamook Co., Neahkahnie Beach Road              | 45.7243  | -123.9288 | UCE      |                    | MN125456 |
| Metanonychus mechanicus | OP3772  | OR: Clatsop Co., Saddle Mountain State Natural Area   | 45.9612  | -123.6877 | Sanger   | 1718s/2776s        | MN125464 |
| Metanonychus mechanicus | OP3773  | OR: Columbia Co., ~5 m S Clatskanie                   | 46.0636  | -123.2678 | Sanger   | PMT1/2776s         | MN125465 |
| Metanonychus mechanicus | OP3774  | WA: Pacific Co., N of Knappton                        | 46.2906  | -123.8114 | Sanger   | PMT1/2776s         | MN125460 |
| Metanonychus mechanicus | OP3775  | WA: Lewis Co., Rainbow Falls State Park               | 46.6301  | -123.2332 | Sanger   | PMT1/2776s         | MN125461 |
| Metanonychus mechanicus | OP3775  | WA: Lewis Co., Rainbow Falls State Park               | 46.6301  | -123.2332 | UCE      |                    | MN125462 |
| Metanonychus mazamus    | OP3776  | OR: Lane Co., E of Belknap Springs                    | 44.1897  | -121.8953 | Sanger   | PMT1/2776s         | MN125426 |
| Metanonychus mazamus    | OP3778  | OR: Lane Co., E of Belknap Springs                    | 44.1897  | -121.8953 | UCE      |                    | MN125427 |

| Species                | Voucher | Locality                                              | Latitude | Longitude | Seq Type | Primers            | GenBank  |
|------------------------|---------|-------------------------------------------------------|----------|-----------|----------|--------------------|----------|
| Metanonychus oregonus  | OP3779  | OR: Lane Co., Goodman Creek Road                      | 43.8429  | -122.6854 | Sanger   | PMT1/2776s         | MN125392 |
| Metanonychus oregonus  | OP3780  | OR: Lane Co., Goodman Creek Road                      | 43.8429  | -122.6854 | UCE      |                    | MN125393 |
| Metanonychus mazamus   | OP3782  | OR: Lane Co., W of Lorane                             | 43.8237  | -123.3242 | Sanger   | 1718s + PMT1/2776s | MN125446 |
| Metanonychus mazamus   | OP3783  | OR: Lane Co., W of Lorane                             | 43.8237  | -123.3242 | UCE      |                    | MN125447 |
| Metanonychus oregonus  | OP3987  | OR: Lane Co., Winberry Creek                          | 43.901   | -122.5971 | Sanger   | PMT1/2776s         | MN125401 |
| Metanonychus mazamus   | OP3990  | OR: Lane Co., Brice Creek Road                        | 43.6749  | -122.729  | Sanger   | PMT1/2776s         | MN125430 |
| Metanonychus oregonus  | OP3993  | OR: Douglas Co., Canton Creek                         | 43.3729  | -122.7555 | Sanger   | PMT1/2776s         | MN125382 |
| Metanonychus oregonus  | OP3995  | OR: Coos Co., Judge Hamilton County Park              | 43.1521  | -123.8116 | Sanger   | PMT1/2776s         | MN125394 |
| Metanonychus oregonus  | OP3996  | OR: Coos Co., Judge Hamilton County Park              | 43.1521  | -123.8116 | UCE      |                    | MN125395 |
| Metanonychus setulus   | OP3997  | OR: Coos Co., Judge Hamilton County Park              | 43.1521  | -123.8116 | Sanger   | PMT1/2776s         | MN125480 |
| Metanonychus mazamus   | OP3999  | OR: Douglas Co., Tyee Mountain                        | 43.4632  | -123.454  | Sanger   | PMT1/2776s         | MN125445 |
| Metanonychus mazamus   | OP4001  | OR: Douglas Co., Cattle Creek                         | 42.8755  | -123.5481 | Sanger   | PMT1/2776s         | MN125432 |
| Metanonychus mazamus   | OP4003  | OR: Douglas Co., near Zinc Creek                      | 43.0414  | -122.786  | Sanger   | PMT1/2776s         | MN125439 |
| Metanonychus mazamus   | OP4011  | OR: Josephine Co., Lower Grave Creek Road             | 42.6543  | -123.5634 | Sanger   | PMT1/2776s         | MN125438 |
| Metanonychus mazamus   | OP4013  | OR: Josephine Co., Savage Creek Road                  | 42.3719  | -123.2481 | Sanger   | PMT1/2776s         | MN125441 |
| Metanonychus mazamus   | OP4015  | OR: Josephine Co., Savage Creek Road                  | 42.3719  | -123.2481 | UCE      |                    | MN125442 |
| Metanonychus mazamus   | OP4195  | CA: Del Norte Co., along SR 197                       | 41.8806  | -124.1321 | Sanger   | 1718s/2776s        | MN125444 |
| Metanonychus mazamus   | OP4202  | OR: Curry Co., N Bank Chetco River Road               | 42.1011  | -124.1965 | UCE      |                    | MN125433 |
| Metanonychus navarrus  | OP4203  | OR: Curry Co., N Bank Chetco River Road               | 42.1011  | -124.1965 | Sanger   | 1718s/2776s        | MN125413 |
| Metanonychus navarrus  | OP4203  | OR: Curry Co., N Bank Chetco River Road               | 42.1011  | -124.1965 | Sanger   | 1718s/2776s        | MN125413 |
| Metanonychus navarrus  | OP4203  | OR: Curry Co., N Bank Chetco River Road               | 42.1011  | -124.1965 | UCE      |                    | MN125412 |
| Metanonychus mazamus   | OP4207  | OR: Curry Co., N Bank Pistol River Road               | 42.2763  | -124.3022 | Sanger   | 1718s/2776s        | MN125440 |
| Metanonychus setulus   | OP4215  | OR: Lincoln Co., Beaver Creek Road                    | 44.5312  | -123.9296 | Sanger   | 1718s/2776s        | MN125467 |
| Metanonychus mazamus   | OP4576  | CA: Del Norte Co., Lake Earl State Wildlife Area      | 41.8008  | -124.2167 | UCE      |                    | MN125436 |
| Metanonychus mazamus   | OP4577  | CA: Del Norte Co., Lake Earl State Wildlife Area      | 41.8008  | -124.2167 | UCE      |                    | MN125435 |
| Metanonychus cascades  | OP4581  | OR: Hood River Co., Herman Creek Trail                | 45.6797  | -121.8435 | UCE      |                    | MN125420 |
| Metanonychus mazamus   | OP4593  | OR: Linn Co., NFD 610, near Fern View Forest Camp     | 44.4024  | -122.3048 | UCE      |                    | MN125434 |
| Metanonychus nigricans | OP974   | CA: Del Norte Co., Del Norte Coast Redwood State Park | 41.6974  | -124.0949 | Sanger   |                    | HM056731 |
| Metanonychus mazamus   | OP985   | OR: Josephine Co., Grave Creek                        |          |           | Sanger   |                    | HM056732 |

| Species                    | Voucher | Locality                                          | Latitude | Longitude | Seq Type | Primers | GenBank                       |
|----------------------------|---------|---------------------------------------------------|----------|-----------|----------|---------|-------------------------------|
| Sclerobunus idahoensis     | OP1649  | ID: Shoshone Co., Hobo Cedar Grove Botanical Area |          |           |          |         | HM056741                      |
| Sclerobunus nondimorphicus | OP222   | WA: Lewis Co., Gifford Pinchot State Park         |          |           |          |         | GQ200413                      |
|                            |         | Type locality (or nearby)                         |          |           |          |         | Published prior to this study |

Derkarabetian\_etal\_SupplementalFile2\_GeneticData\_MorphExamine ig.xlsx  
UCE samples

| Species                 | Voucher     | Locality                                              | Extraction | Sonicated (ng) | raw reads | Contigs | UCE loci | LocI 70% | SNPs 70% | SNPs 50% | SRA          |
|-------------------------|-------------|-------------------------------------------------------|------------|----------------|-----------|---------|----------|----------|----------|----------|--------------|
| Metanonychus cascadus   | SDSU OP3430 | OR: Multnomah Co., Forest Park                        | whole body | 500            | 4700768   | 241485  | 521      | 163      | 263      | 784      | SAMN12165617 |
| Metanonychus cascadus   | SDSU OP3449 | OR: Clackamas Co., 2.3 mi SE Rhododendron             | whole body | 500            | 9574012   | 451078  | 478      | 162      | 253      | 853      | SAMN12165618 |
| Metanonychus cascadus   | SDSU OP3465 | OR: Marion Co., Opal Creek Ancient Forest             | whole body | 500            | 6794488   | 376533  | 483      | 168      | 244      | 772      | SAMN12165619 |
| Metanonychus cascadus   | SDSU OP4581 | OR: Hood River Co., Herman Creek Trail                | whole body | 500            | 4822748   | 235907  | 479      | 158      | 252      | 754      | SAMN12165620 |
| Metanonychus idahoensis | SDSU OP2432 | ID: Shoshone Co., Eagle Creek                         | whole body | 460            | 6749396   | 504183  | 659      | 178      | 301      | 1169     | SAMN12165613 |
| Metanonychus idahoensis | SDSU OP2435 | ID: Clearwater Co., FS 535 4.0 mi NE of FS 100        | whole body | 500            | 6172936   | 460753  | 695      | 178      | 269      | 1018     | SAMN12165614 |
| Metanonychus idahoensis | SDSU OP2438 | ID: Clearwater Co., tributary of Kelly Creek          | whole body | 500            | 9549576   | 625117  | 581      | 169      | 256      | 1008     | SAMN12165615 |
| Metanonychus idahoensis | SDSU OP2756 | ID: Shoshone Co., Hobo Cedar Grove                    | whole body | 411            | 10328788  | 728764  | 710      | 159      | 276      | 1058     | SAMN12165616 |
| Metanonychus mazamus    | SDSU OP3707 | OR: Josephine Co., Board Tree Creek                   | whole body | 500            | 4804388   | 254458  | 354      | 159      | 266      | 668      | SAMN12165621 |
| Metanonychus mazamus    | SDSU OP3715 | OR: Curry Co., E of Cape Sebastian State Park         | whole body | 500            | 2628120   | 158840  | 235      | 118      | 223      | 555      | SAMN12165622 |
| Metanonychus mazamus    | SDSU OP3778 | OR: Lane Co., E of Belknap Springs                    | whole body | 500            | 1793716   | 95748   | 173      | 100      | 178      | 410      | SAMN12165623 |
| Metanonychus mazamus    | SDSU OP3783 | OR: Lane Co., W of Lorane                             | whole body | 500            | 3177548   | 163333  | 392      | 157      | 254      | 681      | SAMN12165624 |
| Metanonychus mazamus    | SDSU OP4015 | OR: Josephine Co., Savage Creek Road                  | whole body | 500            | 1474836   | 96022   | 149      | 95       | 154      | 328      | SAMN12165625 |
| Metanonychus mazamus    | SDSU OP4202 | OR: Curry Co., N Bank Chetco River Road               | legs x4    | 79             | 1670464   | 90936   | 1105     | 143      | 227      | 697      | SAMN12165626 |
| Metanonychus mazamus    | SDSU OP4576 | CA: Del Norte Co., Lake Earl State Wildlife Area      | whole body | 500            | 4162340   | 213638  | 489      | 171      | 280      | 764      | SAMN12165627 |
| Metanonychus mazamus    | SDSU OP4577 | CA: Del Norte Co., Lake Earl State Wildlife Area      | whole body | 500            | 4604068   | 233611  | 457      | 172      | 273      | 807      | SAMN12165628 |
| Metanonychus mechanicus | SDSU OP3404 | OR: Clatsop Co., Fort Stevens State Park              | whole body | 500            | 8233580   | 481715  | 457      | 168      | 287      | 969      | SAMN12165632 |
| Metanonychus mechanicus | SDSU OP3754 | OR: Lincoln Co., Fogarty Creek State Park             | whole body | 500            | 2587720   | 137209  | 207      | 112      | 198      | 534      | SAMN12165633 |
| Metanonychus mechanicus | SDSU OP3756 | OR: Lincoln Co., HB Van Duzer Forest Corridor Wayside | whole body | 500            | 3027768   | 171733  | 217      | 111      | 213      | 495      | SAMN12165634 |
| Metanonychus mechanicus | SDSU OP3771 | OR: Tillamook Co., Neahkahnie Beach Road              | whole body | 500            | 5216944   | 330756  | 619      | 176      | 277      | 919      | SAMN12165635 |
| Metanonychus mechanicus | SDSU OP3775 | WA: Lewis Co., Rainbow Falls State Park               | whole body | 500            | 4664552   | 261497  | 534      | 171      | 269      | 806      | SAMN12165636 |
| Metanonychus navarrus   | SDSU OP3695 | CA: Mendocino Co., Van Damme State Park               | legs x4    | 26             | 2854376   | 155067  | 714      | 172      | 210      | 741      | SAMN12165629 |
| Metanonychus navarrus   | SDSU OP3697 | CA: Humboldt Co., Skunk Cabbage Trail                 | whole body | 357            | 7376516   | 397797  | 519      | 170      | 245      | 786      | SAMN12165630 |
| Metanonychus navarrus   | SDSU OP4203 | OR: Curry Co., N Bank Chetco River Road               | whole body | 281            | 6212584   | 363327  | 561      | 167      | 253      | 823      | SAMN12165631 |
| Metanonychus nigriceps  | SDSU OP3689 | CA: Humboldt Co., Skunk Cabbage Trail                 | whole body | 500            | 7566536   | 551172  | 651      | 172      |          |          | SAMN12165605 |
| Metanonychus nigriceps  | SDSU OP3701 | CA: Del Norte Co., N False Klamath Cove               | whole body | 500            | 8941548   | 615158  | 592      | 164      |          |          | SAMN12165606 |



| Species                | State  | County    | Locality                                                                             | Ecology                      | Collection Date | Collectors                                     | Collection               | Locality # | # Individuals    | Latitude  | Longitude   | Elevation in meters | Elevation in feet (verbatim) |
|------------------------|--------|-----------|--------------------------------------------------------------------------------------|------------------------------|-----------------|------------------------------------------------|--------------------------|------------|------------------|-----------|-------------|---------------------|------------------------------|
| Metanonychus cascadius | Oregon | Clackamas | 2.3 miles SE of Rhododendron, on FR12                                                | under bark/logs              | 2011-05-11      | S. Dekarabetian, A. Smith                      | SDSU Arthropods 100%/80% | SD11 005   | 2m, 5f, 7imm     | 45.30101  | -121.895992 | 522                 | 1713                         |
| Metanonychus cascadius | Oregon | Clackamas | 39 mi SE Estacada approx. 1 mi S of Barton, Barton Park, ?                           | berlese of moss              | 1971-10-09      | E Benedict                                     | SDSU Arthropods 80%      | EB-22      | 2m, 1f           |           |             |                     | 2000                         |
| Metanonychus cascadius | Oregon | Clackamas | Barton County Park, about 1/2 mi S of Barton                                         |                              | 1972-04-22      | EM Benedict                                    | SDSU Arthropods 80%      | EB625-629  | 1m, 2 adults     | 45.38106  | -122.404232 |                     |                              |
| Metanonychus cascadius | Oregon | Clackamas | Collawash R. Canyon on For Ser Rd S-63, 34 mi SE Estacada                            | berlese moss, conifer litter | 1971-10-09      | EM Benedict                                    | SDSU Arthropods 80%      | EB-18      | 1m, 1f           | 44.973658 | -122.060555 |                     |                              |
| Metanonychus cascadius | Oregon | Clackamas | Memaioose Trail, 12 miles S of US 224 along FR45 (Memaioose Creek Road), along trail | woody debris                 | 2011-08-16      | S. Dekarabetian                                | SDSU Arthropods 100%     | SD11 028   | 1f               | 45.09859  | -122.219    | 1107                |                              |
| Metanonychus cascadius | Oregon | Clackamas | Mt. Hood Nat For Rd _57_, Oak Grove Fork, 30 mi SE of Estacada                       | berlese duff                 | 1972-05-26      | EM Benedict                                    | SDSU Arthropods 80%      | EB 6 _691  | 1m               | 45.074043 | -121.974523 |                     |                              |
| Metanonychus cascadius | Oregon | Clackamas | Tollgate Campground, ~6 miles E of Rhododendron                                      | under moist bark/logs        | 2010-11-13      | S. Dekarabetian, E. Brandt, A. Smith, S. Smith | SDSU Arthropods 100%     | SD10 009   | 1f               | 45.32109  | -121.9058   | 388                 | 1273                         |
| Metanonychus cascadius | Oregon | Clackamas | Wildwood Recreation Site, 1.2 miles W of Wernme on US 26                             | under bark by trees stumps   | 2010-11-13      | S. Dekarabetian, E. Brandt, A. Smith, S. Smith | SDSU Arthropods 100%/80% | SD10 008   | 8m, 7f, 3imm, 1? | 45.35219  | -121.99292  | 508                 | 1667                         |



| Species               | State  | County     | Locality                                                       | Ecology                                                          | Collection Date | Collectors                                                | Collection                      | Locality # | # Individuals | Latitude  | Longitude   | Elevation in meters | Elevation in feet (verbatim) |
|-----------------------|--------|------------|----------------------------------------------------------------|------------------------------------------------------------------|-----------------|-----------------------------------------------------------|---------------------------------|------------|---------------|-----------|-------------|---------------------|------------------------------|
| Metanonychus cascadus | Oregon | Hood River | Herman Creek Trail                                             | large boulder pile along trail, <i>P. men.</i> , <i>A. macro</i> | 2012-03-25      | S. Derkarabetian, E. Brandt, A. Smith                     | S. Derkarabetia n 80%           | SD12_001   | 1f            | 45.679694 | -121.843528 | 127                 | 416                          |
| Metanonychus cascadus | Oregon | Hood River | Herman Creek Trail, along US 84                                | woody debris near fallen tree                                    | 2017-08-12      | S. Derkarabetian, M. Sigmonti                             | SDSU Arthropods 100%            | SD17_041   | 1m, 1imm      | 45.6793   | -121.8445   | 150                 |                              |
| Metanonychus cascadus | Oregon | Lane       | Head of Hand Lake Tr., 22 mi NE McKenzie Bridge                | berlese of moss and conifer duff                                 | 1971-10-16      | EM Benedict                                               | SDSU Arthropods 80%             | EB-35      | 1m, 4 adults  | 44.224493 | -121.871774 |                     |                              |
| Metanonychus cascadus | Oregon | Linn       | Swamp Min. Rd., 3 mi S US Rt. 20, 2 mi S, 2 mi E Cascadia      | berlese fir duff                                                 | 1972-04-29      | EM Benedict                                               | SDSU Arthropods 80%             | EB648-649  | 1m, 2 adults  | 44.358525 | -122.451869 |                     |                              |
| Metanonychus cascadus | Oregon | Linn       | Swamp Min. Rd., 3 mi S US Rt. 20, 2 mi S, 2 mi E Cascadia      | berlese fir duff                                                 | 1972-04-29      | EM Benedict                                               | SDSU Arthropods 80%             | EB649      | 11 adults     | 44.358525 | -122.451869 |                     |                              |
| Metanonychus cascadus | Oregon | Marion     | Opal Creek Ancient Forest, Jawbone Flats, along Opal Creek     | under bark, near fallen log                                      | 2011-06-14      | S. Derkarabetian                                          | SDSU Arthropods 100%            | SD11_007   | 2m, 1f        | 44.8463   | -122.20792  | 630                 |                              |
| Metanonychus cascadus | Oregon | Multnomah  | Ainsworth State Park                                           | berlese bigleaf maple duff, moss, etc.                           | 1967-1-1-15     | S. Derkarabetian, K. Quatemass, S. Ovchinnikov, B. Morris | EM Benedict SDSU Arthropods 80% |            | 1m, 4 adults  | 45.595353 | -122.05119  |                     |                              |
| Metanonychus cascadus | Oregon | Multnomah  | Forest Park, Gemantown Road 1.6 miles W of Bridge Road (US 30) | log/dark pile                                                    | 2011-04-17      | S. Derkarabetian, K. Quatemass, S. Ovchinnikov, B. Morris | SDSU Arthropods 100%/80%        | SD11_002   | 2m, 4f        | 45.59217  | -122.78977  | 124                 | 407                          |

| Species                 | State | County     | Locality                                                                                                                            | Ecology                                                                     | Collection Date | Collectors | Collection                 | Locality # | # Individuals | Latitude | Longitude | Elevation in meters | Elevation in feet (verbatim) |
|-------------------------|-------|------------|-------------------------------------------------------------------------------------------------------------------------------------|-----------------------------------------------------------------------------|-----------------|------------|----------------------------|------------|---------------|----------|-----------|---------------------|------------------------------|
| Metanonychus idahoensis | Idaho | Clearwater | FS 734 0.6 miles from FS 255, Clearwater National Forest                                                                            | <i>A. gran. P. men</i> , second growth, streamside woody debris             | 2008-07-20      | C. Richart | SDSU<br>Arthropods<br>100% | CHR2008_70 | 1             | 46.7986  | -115.1226 | 420                 | 1370                         |
| Metanonychus idahoensis | Idaho | Clearwater | small tributary on NW side of Orogrande Creek, FS Road 250 19.0 miles N of SR 11, Clearwater National Forest                        | forest litter;<br><i>Thuja plicata</i>                                      | 2008-07-19      | C. Richart | SDSU<br>Arthropods<br>100% | CHR2008_67 | 1             | 46.5836  | -115.6164 | 295                 | 968                          |
| Metanonychus idahoensis | Idaho | Clearwater | Sourdough Creek, FS246 2 miles E of FS247, Clearwater National Forest                                                               | <i>Thuja plicata</i> / <i>Abies grandis</i> forest, streamside woody debris | 2008-07-21      | C. Richart | C. Richart<br>80%          | CHR2008_74 | 2m            | 46.8093  | -115.6156 | 287                 | 940                          |
| Metanonychus idahoensis | Idaho | Clearwater | tributary of Kelly Creek, E of Junction Mountain Trail No. 106, access via FS 255 1.7 miles E of FS 250, Clearwater National Forest | forest litter;<br><i>Thuja plicata</i> ,<br><i>Abies grandis</i>            | 2008-07-20      | C. Richart | C. Richart<br>80%          | CHR2008_71 | 2f            | 46.7192  | -115.2317 | 261                 | 855                          |
| Metanonychus idahoensis | Idaho | Clearwater | tributary of Kelly Creek, E of Junction Mountain Trail No. 106, access via FS 255 1.7 miles E of FS 250, Clearwater National Forest | forest litter;<br><i>Thuja plicata</i> ,<br><i>Abies grandis</i>            | 2008-07-20      | C. Richart | SDSU<br>Arthropods<br>100% | CHR2008_71 | 5             | 46.7192  | -115.2317 | 261                 | 855                          |

| Species                 | State | County     | Locality                                                                                  | Ecology                                           | Collection Date | Collectors                | Collection          | Locality # | # Individuals | Latitude  | Longitude   | Elevation in meters | Elevation in feet (verbatim) |
|-------------------------|-------|------------|-------------------------------------------------------------------------------------------|---------------------------------------------------|-----------------|---------------------------|---------------------|------------|---------------|-----------|-------------|---------------------|------------------------------|
| Metanonychus idahoensis | Idaho | Clearwater | tributary of Musselshell Creek, FS 535 4.0 miles NE of FS 100, Clearwater National Forest | <i>T. plic. A. gran</i> , streamside woody debris | 2008-07-18      | C. Richart                | C. Richart 80%      | CHR2008_63 | 1m            | 46.7192   | -115.2317   | 264                 | 865                          |
| Metanonychus idahoensis | Idaho | Clearwater | Musselshell Creek, FS 535 4.0 miles NE of FS 100, Clearwater National Forest              | <i>T. plic. A. gran</i> , streamside woody debris | 2008-07-18      | C. Richart                | SDSU Athropods 100% | CHR2008_63 | 3             | 46.7192   | -115.2317   | 264                 | 865                          |
| Metanonychus idahoensis | Idaho | Clearwater | tributary of North Fork Clearwater River, Clearwater National Forest                      | <i>Picea</i> forest, streamside woody debris      | 2008-07-20      | C. Richart                | SDSU Athropods 100% | CHR2008_69 | 1             | 46.8776   | -115.0889   | 348                 | 1140                         |
| Metanonychus idahoensis | Idaho | Shoshone   | Eagle Creek, FS 1214 0.1 miles N of FS 50, St. Joe National Forest                        | <i>T. plic.</i> , streamside woody debris         | 2008-07-27      | C. Richart                | SDSU Athropods 100% | CHR2008_87 | 2             | 47.2122   | -115.5484   | 273                 | 897                          |
| Metanonychus idahoensis | Idaho | Shoshone   | Eagle Creek, FS 1214 0.1 miles N of FS 50, St. Joe National Forest                        | <i>T. plic.</i> , streamside woody debris         | 2008-07-27      | C. Richart                | C. Richart 80%      | CHR2008_87 | 1             | 47.2122   | -115.5484   | 273                 | 897                          |
| Metanonychus idahoensis | Idaho | Shoshone   | Headwaters of Merry Creek along Merry Creek Road                                          |                                                   | 2005-06-03      | W. Leonard, C. Richart    | SDSU Athropods 80%  |            | 1m            | 47.076483 | -116.14445  |                     | 4100                         |
| Metanonychus idahoensis | Idaho | Shoshone   | Hobo Cedar Grove Botanical Area                                                           | woody debris, seep, streams                       | 2011-07-25      | Derkarabetian, C. Richart | SDSU Athropods 100% | SD11_018   | 1             | 47.08603  | -116.11285  | 1362                |                              |
| Metanonychus idahoensis | Idaho | Shoshone   | Hobo Cedar Grove Botanical Area                                                           |                                                   | 2005-06-03      | W. Leonard, C. Richart    | SDSU Athropods 80%  |            | 1m            | 47.085967 | -116.112833 |                     | 4350                         |

| Species                 | State | County   | Locality                                                                                                     | Ecology                                                                                                                         | Collection Date | Collectors                                   | Collection           | Locality # | # Individuals    | Latitude | Longitude | Elevation in meters | Elevation in feet (verbatim) |
|-------------------------|-------|----------|--------------------------------------------------------------------------------------------------------------|---------------------------------------------------------------------------------------------------------------------------------|-----------------|----------------------------------------------|----------------------|------------|------------------|----------|-----------|---------------------|------------------------------|
| Metanonychus idahoensis | Idaho | Shoshone | Hobo Cedar Grove Botanical Area, Idaho Panhandle National Forest                                             | riparian forest litter, <i>Thuja plicata</i> , <i>Taxus brevifolia</i>                                                          | 2007-07-07      | W. Leonard, A. Fusek, C. Richart, V. Leonard | SDSU Arthropods 100% | CHR2007_37 | 1m, 1f, 1imm, 1? | 47.0860  | -116.1128 | 381                 | 1250                         |
| Metanonychus idahoensis | Idaho | Shoshone | Hobo Cedar Grove Botanical Area, Idaho Panhandle National Forest, 11 miles NE of Clarkia on Merry Creek Road | <i>Thuja plicata</i> , <i>Taxus brevifolia</i> , riparian litter and woody debris                                               | 2007-07-07      | W. Leonard, A. Fusek, C. Richart, V. Leonard | C. Richart 80%       | CHR2007_37 | 1m               | 47.0860  | -116.1128 | 381                 | 1250                         |
| Metanonychus idahoensis | Idaho | Shoshone | Hobo Cedar Grove Botanical Area, St. Joe National Forest                                                     | old growth forest litter, <i>Thuja plicata</i> , <i>Taxus brevifolia</i> , forest moss, seep-spring and streamside woody debris | 2009-10-17      | C. Richart, W. Leonard                       | SDSU Arthropods 100% | CHR2009_34 | 3                | 47.0860  | -116.1152 | 395                 | 1295                         |
| Metanonychus idahoensis | Idaho | Shoshone | Hobo Cedar Grove Botanical Area, St. Joe National Forest                                                     | old growth forest litter, <i>Thuja plicata</i> , <i>Taxus brevifolia</i> , forest moss, seep-spring and streamside woody debris | 2009-10-17      | C. Richart, W. Leonard                       | C. Richart 80%       | CHR2009_34 | 4m, 1f           | 47.0860  | -116.1152 | 395                 | 1295                         |
| Metanonychus idahoensis | Idaho | Shoshone | Hobo Cedar Grove Botanical Area, St. Joe National Forest                                                     | old growth forest litter, <i>Thuja plicata</i> , <i>Taxus brevifolia</i>                                                        | 2008-07-25      | C. Richart                                   | SDSU Arthropods 100% | CHR2008_79 | 1                | 47.0861  | -116.1129 | 395                 | 1295                         |

| Species              | State      | County    | Locality                                                                                    | Ecology                                                 | Collection Date | Collectors                                                     | Collection               | Locality # | # Individuals | Latitude | Longitude | Elevation in meters | Elevation in feet (verbatim) |
|----------------------|------------|-----------|---------------------------------------------------------------------------------------------|---------------------------------------------------------|-----------------|----------------------------------------------------------------|--------------------------|------------|---------------|----------|-----------|---------------------|------------------------------|
| Metanonychus mazamas | Oregon     | Lane      | Hwy 242, E of Belknap springs                                                               | old growth Douglas fir forest / woody debris            | 2014-08-18      | M'Hedin, E. Ciaccio, A. Cabrero, J. Starrett, S. Derkarabetian | SDSU Arthropods 100%     | MCH14_057  | 1m, 2f        | 44.1897  | -121.8953 | 1300                |                              |
| Metanonychus mazamus | California | Del Norte | along SR 197, 0.2 miles E of US 101                                                         | disturbed conifer forest / bark piles at base of stumps | 2015-06-12      | S. Derkarabetian, A. Cabrero                                   | SDSU Arthropods 100%/80% | SD15_013   | 2m, 3imm      | 41.8806  | -124.1321 | 1063                |                              |
| Metanonychus mazamus | California | Del Norte | Lake Earl State Wildlife Area, end of Old Mill Road                                         | mixed conifer forest, sandy, woody debris               | 2017-08-08      | S. Derkarabetian, C. Richard, M. Sigismonti                    | SDSU Arthropods 100%     | SD17_039   | 1f, 1imm      | 41.8008  | -124.2167 | 25                  |                              |
| Metanonychus mazamus | Oregon     | Coos      | 10 mi E, 1 mi S Allegany, Weyerhaeuser Milllicoma Tree Farm, Comp Rd 4110, T25S R10W sec 12 | berese rhododendron-conifer duff and litter             | 1971-11-20      | EM Benedict                                                    | SDSU Arthropods 80%      | EB-149     | 1m, 1 adult   |          |           |                     |                              |
| Metanonychus mazamus | Oregon     | Coos      | 10 mi E, 2 mi S Allegany, Weyerhaeuser Milllicoma Tree Farm, Comp Rd 5046, T25S R10W sec 13 | berese rotted wood, some litter                         | 1971-11-21      | EM Benedict                                                    | SDSU Arthropods 80%      | EB-150     | 2m            |          |           |                     |                              |
| Metanonychus mazamus | Oregon     | Coos      | 9 mi E, 5 mi S Allegany, Weyerhaeuser Milllicoma Tree Farm, Comp Rd 6013, T25S R10W sec 26  | berese rotted wood, huckleberry litter                  | 1971-11-21      | EM Benedict                                                    | SDSU Arthropods 80%      | EB-155     | 1m            |          |           |                     |                              |

| Species               | State  | County | Locality                                                                          | Ecology                                                                                                                                                                                | Collection Date | Collectors                                                     | Collection                | Locality # | # Individuals | Latitude | Longitude | Elevation in meters | Elevation in feet (verbatim) |
|-----------------------|--------|--------|-----------------------------------------------------------------------------------|----------------------------------------------------------------------------------------------------------------------------------------------------------------------------------------|-----------------|----------------------------------------------------------------|---------------------------|------------|---------------|----------|-----------|---------------------|------------------------------|
| Metanonychus mazarnus | Oregon | Coos   | Judge Hamilton County Park, Coos Bay Wagon Road 1.4 miles W of Dead Horse Road    | riparian mixed forest adjacent sandstone cliff, <i>Acer macrophyllum</i> , <i>Myrica californica</i> , <i>Rubus spectabilis</i> , <i>Polystichum munitum</i> ; woody debris and litter | 2015-03-30      | J. Starrett, S. Derkarabetian, A. Cabrero, C. Richart          | SDSU Arthropods 100%      | SD15_005   | 2f            | 43.1521  | -123.8116 | 216                 |                              |
| Metanonychus mazarnus | Oregon | Curry  | along Lobster Creek, 1/4 mile N of bridge over Rogue River, E side of creek/ road | doug fir forest / woody debris                                                                                                                                                         | 2014-08-11      | M.Hedin, E. Ciaccio, A. Cabrero, J. Starrett, S. Derkarabetian | SDSU Arthropods 100%/ 80% | MCH14_02   | 1m, 4f        | 42.5094  | -124.2948 | 80                  |                              |
| Metanonychus mazarnus | Oregon | Curry  | North Bank Chetco River Road, 6.1 miles E of US 101                               | <i>Pseudotsuga menziesii</i> , <i>Polystichum</i> / woody debris                                                                                                                       | 2015-06-12      | S. Derkarabetian, A. Cabrero                                   | SDSU Arthropods 100%/ 80% | SD15_014   | 1m, 1f, 3imm  | 42.1011  | -124.1965 | 24                  |                              |
| Metanonychus mazarnus | Oregon | Curry  | E of Cape Sebastian State Park, Myers Creek Road                                  | disturbed mixed conifer forest / woody debris                                                                                                                                          | 2014-08-11      | M.Hedin, E. Ciaccio, A. Cabrero, J. Starrett, S. Derkarabetian | SDSU Arthropods 100%/ 80% | MCH14_03   | 1m, 3f        | 42.3316  | -124.4106 | 210                 |                              |

| Species               | State  | County  | Locality                                                                                           | Ecology                                                                                                                                                                            | Collection Date | Collectors                                            | Collection                     | Locality # | # Individuals | Latitude  | Longitude  | Elevation in meters | Elevation in feet (verbatim) |
|-----------------------|--------|---------|----------------------------------------------------------------------------------------------------|------------------------------------------------------------------------------------------------------------------------------------------------------------------------------------|-----------------|-------------------------------------------------------|--------------------------------|------------|---------------|-----------|------------|---------------------|------------------------------|
| Metanonychus mazarnus | Oregon | Douglas | campground at intersect of FS 1633 and SR 227 at 4.0 miles S of Tison Road, Umpqua National Forest | riparian forest, <i>Pseudotsuga menziesii</i> , <i>Abies grandis</i> , <i>Taxus brevifolia</i> , <i>Alnus rubra</i> , <i>Lysichiton americanus</i> , moss; woody debris and litter | 2015-03-31      | J. Starrett, S. Derkarabetian, A. Cabrero, C. Richart | SDSU<br>Arthropods<br>100%/80% | SD15 009   | 5m, 1f        | 42.8037   | -122.8676  | 815                 |                              |
| Metanonychus mazarnus | Oregon | Douglas | Cattle Creek, unnamed road 0.7 miles E of Cow Creek Road at 11.8 miles SW of Glenbrook Loop Road   | managed <i>Pseudotsuga menziesii</i> forest; woody debris                                                                                                                          | 2015-03-30      | J. Starrett, S. Derkarabetian, A. Cabrero, C. Richart | SDSU<br>Arthropods<br>100%     | SD15 007   | 1m            | 42.8755   | -123.5481  | 300                 |                              |
| Metanonychus mazarnus | Oregon | Douglas | Diamond Creek Road 5.0 miles S of Dew, Umpqua National Forest                                      | managed <i>Pseudotsuga menziesii</i> forest; woody debris                                                                                                                          | 2015-03-31      | J. Starrett, S. Derkarabetian, A. Cabrero, C. Richart | SDSU<br>Arthropods<br>100%/80% | SD15 010   | 3m, 3f, 2imm  | 42.8259   | -122.9252  | 865                 |                              |
| Metanonychus mazarnus | Oregon | Douglas | Eagle Rock Campground, 3 miles S 9 mi E Steamboat on 138; T26S R2E sec 23                          | berlese <i>Pseudotsuga</i> duff                                                                                                                                                    | 1971-10-30      | EM Benedict                                           | SDSU<br>Arthropods<br>80%      | EB-83      | 1m, 1f        | 43.295845 | -122.55447 |                     | 1600                         |

| Species                | State  | County  | Locality                                                                                                | Ecology                                                                                                                                                                                                       | Collection Date | Collectors                                            | Collection                      | Locality #                | # Individuals    | Latitude | Longitude | Elevation in meters | Elevation in feet (verbatim) |
|------------------------|--------|---------|---------------------------------------------------------------------------------------------------------|---------------------------------------------------------------------------------------------------------------------------------------------------------------------------------------------------------------|-----------------|-------------------------------------------------------|---------------------------------|---------------------------|------------------|----------|-----------|---------------------|------------------------------|
| Metanonychnus mazarnus | Oregon | Douglas | Hwy 227 S of Drew                                                                                       | edge of old growth / second growth <i>Pseudotsuga menziesii</i> ; <i>Tsuga heterophylla</i> , <i>Thuja plicata</i> , <i>Zinc Creek, FS 2980</i> 0.2 miles E of <i>brevifolia</i> , mossy forest; woody debris | 2014-08-10      | M.Hedin, E. Ciaccio, A. Cabrero, J. Starratt          | SDSU<br>Arthropods<br>100%/ 80% | MCH14_02<br>6             | 1m, 1f           | 42.8414  | -122.8509 | 500                 |                              |
| Metanonychnus mazarnus | Oregon | Douglas | south of South Umpqua River near Zinc Creek, FS 2980 0.2 miles E of <i>brevifolia</i> , National Forest | Coniferous forest with riparian forest corridor; <i>Pseudotsuga menziesii</i> ; <i>Acer macrophyllum</i> , <i>Polystichum munifolium</i> ; woody debris, sandstone                                            | 2015-03-31      | J. Starratt, S. Derkarabetian, A. Cabrero, C. Richart | SDSU<br>Arthropods<br>100%/ 80% | SD15_008                  | 7m, 7f           | 43.0414  | -122.786  | 456                 |                              |
| Metanonychnus mazarnus | Oregon | Douglas | Tyee Mountain, Little Canyon Creek, SR 138 1.5 mi SE of Tyee Rd                                         | old growth Douglas fir forest / woody debris                                                                                                                                                                  | 2014-08-10      | M.Hedin, E. Ciaccio, A. Cabrero, J. Starratt          | SDSU<br>Arthropods<br>100%/ 80% | SD15_006<br>MCH14_02<br>5 | 2m, 1f<br>3m, 2f | 43.4632  | -123.454  | 150                 | 600                          |



| Species              | State  | County    | Locality                                                                                      | Ecology                                                                                                                                | Collection Date | Collectors                                                       | Collection                     | Locality #    | # Individuals | Latitude | Longitude   | Elevation in meters | Elevation in feet (verbatim) |
|----------------------|--------|-----------|-----------------------------------------------------------------------------------------------|----------------------------------------------------------------------------------------------------------------------------------------|-----------------|------------------------------------------------------------------|--------------------------------|---------------|---------------|----------|-------------|---------------------|------------------------------|
| Metanonychus mazamus | Oregon | Josephine | Grave Creek, near confluence w Butte Creek, off Lower Grave Creek Road                        | N-facing doug fir forest                                                                                                               | 2006-08-15      | M. Hedlin, R. Keith, M. McCormack                                | SDSU<br>Arthropods<br>100%     | MCH06_11<br>6 | 2f, 1?2       | 42.6414  | -123.5062   | 305                 | 1000                         |
| Metanonychus mazamus | Oregon | Josephine | Lower Grave Creek Road 1.3 miles E of Merlin Galice Road                                      | managed <i>Myrica californica</i> , <i>Pseudotsuga menziesii</i> , <i>Acer macrophyllum</i> forest; woody debris                       | 2015-03-31      | J. Starrett, S. DeKarbabetian, A. Cabrero, C. Richart            | SDSU<br>Arthropods<br>100%     | SD15_011      | 1m            | 42.6543  | -123.5634   | 230                 |                              |
| Metanonychus mazamus | Oregon | Josephine | Savage Creek Road 3.8 miles S of SR 99                                                        | <i>Acer macrophyllum</i> , <i>Alnus rubra</i> , <i>Abutilus menziesii</i> , <i>Polystichum munitum</i> forest; woody debris and litter | 2015-04-01      | J. Starrett, S. DeKarbabetian, A. Cabrero, C. Richart            | SDSU<br>Arthropods<br>100%/80% | SD15_012      | 6m, 6f        | 42.3719  | -123.2481   | 711                 |                              |
| Metanonychus mazamus | Oregon | Lane      | 17 mi NE McKenzie Bridge, McKenzie Pass Hwy 242                                               | ber moss, wood, conifers                                                                                                               | 1971-10-16      | E Benedict                                                       | SDSU<br>Arthropods<br>80%      | EB-40         | 1m            | 44.18501 | -121.899226 |                     |                              |
| Metanonychus mazamus | Oregon | Lane      | Siuslaw River Road, W of Lorange NFD 610, 0.1 mi W jnct. w NF 302, near Fern View Forest Camp | old growth Douglas fir forest / woody debris<br>mixed forest, woody debris surrounding rotting stumps                                  | 2014-08-19      | M. Hedlin, E. Ciaccio, A. Cabrero, J. Starrett, S. DeKarbabetian | SDSU<br>Arthropods<br>100%/80% | MCH14_06<br>0 | 2m, 2f, 1imm  | 43.8237  | -123.3242   | 180                 |                              |
| Metanonychus mazamus | Oregon | Lin       |                                                                                               |                                                                                                                                        | 2017-08-14      | S. DeKarbabetian, M. Sigmonti                                    | SDSU<br>Arthropods<br>100%     | SD17_047      | 2m            | 44.4024  | -122.3048   | 425                 |                              |

| Species                 | State  | County  | Locality                                                                                   | Ecology                                                      | Collection Date | Collectors                                                     | Collection                     | Locality # | # individuals | Latitude  | Longitude   | Elevation in meters | Elevation in feet (verbatim) |
|-------------------------|--------|---------|--------------------------------------------------------------------------------------------|--------------------------------------------------------------|-----------------|----------------------------------------------------------------|--------------------------------|------------|---------------|-----------|-------------|---------------------|------------------------------|
| Metanonychus mechanicus | Oregon | Clatsop | 3 mi SE Olney on Ore 202, T7N/R8W/S20                                                      |                                                              | 1972-11-27      | E Benedict                                                     | SDSU<br>Arthropods<br>80%      | EB-174-175 | 1m, 1f        | 46.081635 | -123.707968 |                     | 400                          |
| Metanonychus mechanicus | Oregon | Clatsop | 5 mi N, 7 mi W Elsie, T5N/R9W                                                              |                                                              | 1972-03-15      | E Benedict                                                     | SDSU<br>Arthropods<br>80%      | EB-502-505 | 12 adults     |           |             |                     | 700                          |
| Metanonychus mechanicus | Oregon | Clatsop | 6 mi SE N Fork Klaskanne R, T7N/R8W/S?                                                     |                                                              | 1971-11-27      | E Benedict                                                     | SDSU<br>Arthropods<br>80%      | EB-168     | 8 adults      |           |             |                     | 800                          |
| Metanonychus mechanicus | Oregon | Clatsop | Ecola State Park, Ecola Point Parking; along trail N of lot                                | leaf litter, woody debris                                    | 2011-07-12      | S. Derkarabetian, AAS fieldtrip                                | SDSU<br>Arthropods<br>100%     | SD11_011   | 2f            | 45.92352  | -123.97327  | 80                  |                              |
| Metanonychus mechanicus | Oregon | Clatsop | Fort Stevens State Park, 0.5 miles S of Battery Russell Parking lot                        | under bark pile, along paved path, trail past post #5        | 2010-10-09      | S. Derkarabetian                                               | SDSU<br>Arthropods<br>100%     | SD10_007   | 2f, 1?        | 46.189339 | -123.970378 | 6                   | 20                           |
| Metanonychus mechanicus | Oregon | Clatsop | Saddle Mountain State Natural Area, ~300 yards up trail to peak                            | rich mixed conifer forest / woody debris                     | 2014-08-16      | M.Hedin, E. Ciaccio, A. Cabrero, J. Starrett, S. Derkarabetian | SDSU<br>Arthropods<br>100%/80% | MCH14_05   | 1m, 1f, 1imm  | 45.9612   | -123.6877   | 550                 |                              |
| Metanonychus mechanicus | Oregon | Clatsop | Saddle Mountain State Natural Area, along Saddle Mountain Trail                            | woody debris associated with Tsuga heterophylla, Alnus rubra | 2012-06-09      | S. Derkarabetian, J. Bevis                                     | S. Derkarabetian<br>n 80%      | SD12_004   | 2f            | 45.963    | -123.6901   | 500                 |                              |
| Metanonychus mechanicus | Oregon | Clatsop | Saddle Mountain State Park, Saddle Mountain Road, 0.4 miles S of SR26, 10.5 miles E of 101 | litter and woody debris, slope                               | 2008-04-03      | S. Derkarabetian, C. Richart                                   | SDSU<br>Arthropods<br>100%     | SD08_007   | 1m            | 45.908    | -123.7442   | 120                 | 393                          |

| Species                 | State  | County    | Locality                                                                                 | Ecology                                      | Collection Date | Collectors                                                    | Collection              | Locality # | # individuals | Latitude  | Longitude   | Elevation in meters | Elevation in feet (verbatim) |
|-------------------------|--------|-----------|------------------------------------------------------------------------------------------|----------------------------------------------|-----------------|---------------------------------------------------------------|-------------------------|------------|---------------|-----------|-------------|---------------------|------------------------------|
| Metanonychus mechanicus | Oregon | Columbia  | Hwy 47, ~5 miles S of Clatskanie                                                         | decent Douglas fir forest / woody debris     | 2014-08-17      | M.Hedin, E. Ciaccio, A. Cabrero, J. Starrett, S. DeKarabetian | SDSU Athropods 100%     | MCH14_05   | 1f            | 46.0636   | -123.2678   | 390                 |                              |
| Metanonychus mechanicus | Oregon | Lincoln   | Fogarty Creek State Park, South Creek Area, N of Depoe Bay                               | Sitka spruce dominated forest / woody debris | 2014-08-15      | M.Hedin, E. Ciaccio, A. Cabrero, J. Starrett, S. DeKarabetian | SDSU Athropods 100%/80% | MCH14_04   | 2m, 4f, 1imm  | 44.8375   | -123.0503   | 10                  |                              |
| Metanonychus mechanicus | Oregon | Lincoln   | Hwy 18, H.B. Van Duzer Forest Corridor Wayside                                           | decent Douglas fir forest / woody debris     | 2014-08-15      | Ciaccio, A. Cabrero, J. Starrett, S. DeKarabetian             | SDSU Athropods 100%/80% | MCH14_04   | 1m, 5f, 3imm  | 44.0385   | -123.8088   | 120                 |                              |
| Metanonychus mechanicus | Oregon | Tillamook | Hwy 101 at Neahkahnie Beach Road                                                         | roadside disturbed forest / woody debris     | 2014-08-16      | M.Hedin, E. Ciaccio, A. Cabrero, J. Starrett, S. DeKarabetian | SDSU Athropods 100%/80% | MCH14_05   | 2m, 3f        | 45.7243   | -123.9288   | 60                  |                              |
| Metanonychus mechanicus | Oregon | Tillamook | Hwy 6, along Wilson River, near Kansas Creek                                             | roadside Douglas fir forest / woody debris   | 2014-08-16      | M.Hedin, E. Ciaccio, A. Cabrero, J. Starrett, S. DeKarabetian | SDSU Athropods 100%/80% | MCH14_04   | 2m, 1f, 1imm  | 45.4914   | -123.6346   | 65                  |                              |
| Metanonychus mechanicus | Oregon | Tillamook | Kiwanda Viewpoint on Cape Lookout, 2.5 mi N, 1.5 mi W of Sandlake                        | berlese "rain forest" duff                   | 1972-11-04      | EM Benedict                                                   | SDSU Athropods 80%      | EB 1022(?) | 12 adults     | 45.340999 | -123.973802 |                     | 600                          |
| Metanonychus mechanicus | Oregon | Tillamook | Neahkahnie Mountain Trail, Oswald West State Park, ~1.4 miles N of Manzanita, off US 101 | under bark/rocks                             | 2011-05-22      | S. DeKarabetian, S. Moore                                     | SDSU Athropods 100%     | SD11_006   | 1m, 1f        | 45.74503  | -123.95029  | 310                 | 1018                         |

| Species                 | State      | County     | Locality                                                                    | Ecology                                           | Collection Date | Collectors                                                     | Collection           | Locality # | # Individuals | Latitude  | Longitude   | Elevation in meters | Elevation in feet (verbatim) |
|-------------------------|------------|------------|-----------------------------------------------------------------------------|---------------------------------------------------|-----------------|----------------------------------------------------------------|----------------------|------------|---------------|-----------|-------------|---------------------|------------------------------|
| Metanonychus mechanicus | Oregon     | Tillamook  | near Nenalem Falls Campground, along Nehalem River, Foss Road, E of Nehalem | N-facing mixed conifer forest / woody debris      | 2014-08-16      | M.Hedin, E. Ciaccio, A. Cabrero, J. Starrett, S. Derkarabetian | SDSU Arthropods 100% | MCH14_04   | 2m, 1f        | 45.7299   | -123.7687   | 60                  |                              |
| Metanonychus mechanicus | Oregon     | Tillamook  | road to Elk Creek Campground, off Hwy 6, along South Fork Wilson River      | decent Douglas fir forest / sifted litter         | 2014-08-15      | M.Hedin, E. Ciaccio, A. Cabrero, J. Starrett, S. Derkarabetian | SDSU Arthropods 100% | MCH14_04   | 1m, 1f        | 45.6081   | -123.4617   | 270                 |                              |
| Metanonychus mechanicus | Oregon     | Tillamook  | Suslaw National Forest, 1.8 miles W of US 101 on Farmer Creek Road          | woody debris, leaf litter                         | 2011-08-01      | S. Derkarabetian                                               | SDSU Arthropods 100% | SD11_023   | 1f, 1mm       | 45.25423  | -123.88339  | 75                  |                              |
| Metanonychus mechanicus | Oregon     | Washington | 0.3 mi W SPRR overpass on Hwy 26, 3 mi E Timber; T3N R5W sec?               | berese vine maple, Douglas fir                    | 1971-11-27      | EM Benedict                                                    | SDSU Arthropods 80%  | EB-159     | 4 adults      |           |             | 900                 |                              |
| Metanonychus mechanicus | Oregon     | Washington | 1.7 mi SW Timber: T3N R5W sec?                                              | berese red alder duff, moss, bark flakes, sawdust | 1971-11-27      | EM Benedict                                                    | SDSU Arthropods 80%  | EB-162-163 | 1m            | 45.70737  | -123.322329 |                     | 900                          |
| Metanonychus mechanicus | Oregon     | Yamhill    | 0.2 mi S Wapato on Hwy 47                                                   | berese of rotten wood                             | 1971-10-02      | EM Benedict                                                    | SDSU Arthropods 80%  | EB-6       | 4 adults      | 45.398646 | -123.128394 |                     |                              |
| Metanonychus mechanicus | Washington | Lewis      | Rainbow Falls State Park, south side hiking trail, off Hwy 6                | old growth Douglas fir forest / woody debris      | 2014-08-17      | M.Hedin, E. Ciaccio, A. Cabrero, J. Starrett, S. Derkarabetian | SDSU Arthropods 100% | MCH14_05   | 4             | 46.6301   | -123.2332   | 80                  |                              |

| Species                 | State      | County    | Locality                                                                                                 | Ecology                                                                                            | Collection Date | Collectors                                                     | Collection               | Locality # | # individuals | Latitude | Longitude | Elevation in meters | Elevation in feet (verbatim) |
|-------------------------|------------|-----------|----------------------------------------------------------------------------------------------------------|----------------------------------------------------------------------------------------------------|-----------------|----------------------------------------------------------------|--------------------------|------------|---------------|----------|-----------|---------------------|------------------------------|
| Metanonychus mechanicus | Washington | Pacific   | Hwy 401, N of Knapppton                                                                                  | decent Douglas fir forest / woody debris                                                           | 2014-08-17      | M.Hedin, E. Ciaccio, A. Cabrero, J. Starrett, S. Derkarabetian | SDSU Arthropods 100%     | MCH14_05   | 1f            | 46.2906  | -123.8114 | 60                  |                              |
| Metanonychus navarrus   | California | Humboldt  | vic trailhead of Skunk Cabbage Section, Prairie Creek Redwoods, N of Orick                               | old growth redwood forest / woody debris                                                           | 2014-08-08      | M.Hedin, E. Ciaccio, A. Cabrero, J. Starrett                   | SDSU Arthropods 100%/80% | MCH14_01   | 3m, 1f        | 40.307   | -124.0569 | 40                  |                              |
| Metanonychus navarrus   | California | Mendocino | Mendocino Co., Van Damme State Park, Little River, Fern Canyon Hiking Trail                              | mixed redwood forest / woody debris                                                                | 2014-08-07      | M.Hedin, E. Ciaccio, A. Cabrero, J. Starrett                   | SDSU Arthropods 100%     | MCH14_01   | 1m            | 39.277   | -123.7779 | 25                  |                              |
| Metanonychus navarrus   | Oregon     | Curry     | Redwood Nature Trail, north bank Chetco River Road 0.6 miles NW of entrance to Alfred A. Loeb State Park | <i>Sequoia sempervivens</i> , <i>Umbellularia californica</i> forest; woody debris and leaf litter | 2011-04-01      | E. Garcia, C. Richart, A. Schönhofer, D. Sitzmann              | C. Richart 80%           |            | 1f            | 42.1187  | -124.1959 | 40                  |                              |
| Metanonychus nigricans  | California | Del Norte | Del Norte Coast Redwood State Park, Mill Creek Canyon Campground                                         | redwood forest at night                                                                            | 2006-08-17      | M. Hedin                                                       | SDSU Arthropods 100%     | MCH06_12   | 1             | 41.6974  | -124.0949 | 120                 |                              |
| Metanonychus nigricans  | California | Del Norte | Hwy 101, N of False Klamath Cove                                                                         | old growth redwood forest / woody debris                                                           | 2014-08-08      | M.Hedin, E. Ciaccio, A. Cabrero, J. Starrett                   | SDSU Arthropods 100%     | MCH14_01   | 1m, 1f        | 41.6562  | -124.1165 | 300                 |                              |
| Metanonychus nigricans  | California | Del Norte | S of Fort Dick                                                                                           | disturbed redwood forest / woody debris                                                            | 2014-08-09      | M.Hedin, E. Ciaccio, A. Cabrero, J. Starrett                   | SDSU Arthropods 100%/80% | MCH14_02   | 1m, 4f        | 41.8478  | -124.1595 | 20                  |                              |

| Species                | State      | County   | Locality                                                                                   | Ecology                                                           | Collection Date | Collectors                                    | Collection                     | Locality #    | # Individuals | Latitude  | Longitude   | Elevation in meters | Elevation in feet (verbatim) |
|------------------------|------------|----------|--------------------------------------------------------------------------------------------|-------------------------------------------------------------------|-----------------|-----------------------------------------------|--------------------------------|---------------|---------------|-----------|-------------|---------------------|------------------------------|
| Metanonychus nigricans | California | Humboldt | vic trailhead of Skunk Cabbage Section, Prairie Creek Redwoods, N of Orick                 | old growth redwood forest / woody debris                          | 2014-08-08      | M Hedlin, E. Giaccio, A. Cabrero, J. Starrett | SDSU<br>Arthropods<br>100%/80% | MCH14_01<br>7 | 3f            | 40.307    | -124.0569   | 40                  |                              |
| Metanonychus oregonus  | Oregon     | Benton   | 0.9 mi on Boltkn Rd. from Rt 34                                                            |                                                                   | 2005-02-25      | W. Leonard, C. Richart                        | SDSU<br>Arthropods<br>80%      |               | 2f            | 44.465667 | -123.461333 |                     |                              |
| Metanonychus oregonus  | Oregon     | Benton   | Rt. 34 at Benton Co. line                                                                  | berlese maple, alder duff                                         | 1960-10-30      | DR Malcolm                                    | SDSU<br>Arthropods<br>80%      |               | 2m            | 44.380411 | -123.715708 |                     |                              |
| Metanonychus oregonus  | Oregon     | Coos     | 1/4 mi N Boundary Nat For Campground, T32S/R11W/S6                                         |                                                                   | 1972-02-19      | E Benedict                                    | SDSU<br>Arthropods<br>80%      | EB-421-428    | 1m            | 42.833347 | -124.031637 |                     | 300                          |
| Metanonychus oregonus  | Oregon     | Coos     | 10 mi E, 1 mi S Allegany, Weyethauser Milllicoma Tree Farm, Comp Rd 4110; T25S R10W sec 12 | berlese rhododendron-conifer duff and litter                      | 1971-11-20      | EM Benedict                                   | SDSU<br>Arthropods<br>80%      | EB-149        | 3f            |           |             |                     |                              |
| Metanonychus oregonus  | Oregon     | Coos     | 14 mi E, 2 mi S Allegany, Weyethauser Milllicoma Tree Farm, Comp Rd 6000; T25S R9W sec 16  | berlese duff, moss, wood, litter from riparian zone of Fall Creek | 1971-11-21      | EM Benedict                                   | SDSU<br>Arthropods<br>80%      | EB-151-154    | 2m, 2f        |           |             |                     |                              |
| Metanonychus oregonus  | Oregon     | Coos     | Charleston, Marine Inst                                                                    |                                                                   | 1967-04-30      | E Benedict                                    | SDSU<br>Arthropods<br>80%      |               | 2m, 1f        | 43.345011 | -124.328803 |                     |                              |
| Metanonychus oregonus  | Oregon     | Douglas  | 3.2 mi NE Scottsburg, T22S/R9W/S5                                                          |                                                                   | 1971-12-11      | E Benedict                                    | SDSU<br>Arthropods<br>80%      | EB221, 222    | 1m, 1f        | 43.688544 | -123.798559 |                     | 400                          |

| Species               | State  | County  | Locality                                                                                                          | Ecology                                                                                                                                                                   | Collection Date | Collectors                                            | Collection                      | Locality # | # Individuals | Latitude | Longitude | Elevation in meters | Elevation in feet (verbatim) |
|-----------------------|--------|---------|-------------------------------------------------------------------------------------------------------------------|---------------------------------------------------------------------------------------------------------------------------------------------------------------------------|-----------------|-------------------------------------------------------|---------------------------------|------------|---------------|----------|-----------|---------------------|------------------------------|
| Metanonychus oregonus | Oregon | Douglas | Canton Creek, Canton Creek Road 2.3 miles NE of FS 38, Umpqua National Forest                                     | mpatan seep-spring, <i>Thuja plicata</i> , <i>Pseudotsuga menziesii</i> , <i>Acer macrophyllum</i> , <i>Polystichum munium</i> , and moss forest; woody debris and litter | 2015-03-29      | J. Starrett, S. Derkarabetian, A. Cabrero, C. Richart | SDSU<br>Arthropods<br>100%      | SD15_003   | 1f            | 43.3729  | -122.7555 | 404                 |                              |
| Metanonychus oregonus | Oregon | Lane    | Brice Creek, Brice Creek Road 3.3 miles SE of FS 17, Umpqua National Forest                                       | <i>Acer macrophyllum</i> , <i>Thuja plicata</i> , <i>Pseudotsuga menziesii</i> , <i>Polystichum munium</i> forest; woody debris and litter                                | 2015-03-29      | J. Starrett, S. Derkarabetian, A. Cabrero, C. Richart | SDSU<br>Arthropods<br>100%/ 80% | SD15_002   | 3m, 1?        | 43.6749  | -122.729  | 418                 |                              |
| Metanonychus oregonus | Oregon | Lane    | Clark Creek Community Camp, 12.7 miles E of Jasper Lowell Road on Big Fall Creek Road, Willamette National Forest | Maple, litter and woody debris                                                                                                                                            | 2008-04-01      | S. Derkarabetian, C. Richart                          | SDSU<br>Arthropods<br>100%      | SD08_001   | 1f            | 43.9725  | -122.5793 | 345                 | 1132                         |

| Species               | State  | County | Locality                                                                                                                  | Ecology                                                                                | Collection Date | Collectors                                           | Collection               | Locality # | # Individuals | Latitude | Longitude  | Elevation in meters | Elevation in feet (verbatim) |
|-----------------------|--------|--------|---------------------------------------------------------------------------------------------------------------------------|----------------------------------------------------------------------------------------|-----------------|------------------------------------------------------|--------------------------|------------|---------------|----------|------------|---------------------|------------------------------|
| Metanonychus oregonus | Oregon | Lane   | Clark Creek Organizational Campground, 12.7 miles E of Jasper-Lowell Road, on Big Fall Creek Road                         | <i>Polystichum</i> leaf litter                                                         | 2011-08-17      | S. DeKarabetian                                      | SDSU Arthropods 100%     | SD11_031   | 1m, 1f        | 43.97315 | -122.57839 | 330                 |                              |
| Metanonychus oregonus | Oregon | Lane   | Clark Creek Organizational Campground, Big Fall Creek Road 12.6 miles E of Jasper-Lowell Road, Willamette National Forest | litter and woody debris, Acer macrophyllum, Polystichum munitum, Pseudotsuga menziesii | 2007-05-28      | C. Richart, A. Fusek                                 | SDSU Arthropods 100%     | CHR2007_21 | 1             | 43.9733  | -122.5808  | 314                 |                              |
| Metanonychus oregonus | Oregon | Lane   | Clark Creek Organizational Campground, Big Fall Creek Road 12.7 miles E of Jasper-Lowell Road, Willamette National Forest | litter and woody debris, Acer macrophyllum, Polystichum munitum, Pseudotsuga menziesii | 2008-04-01      | C. Richart, S. DeKarabetian                          | C. Richart 80%           | CHR2008_08 | 1f            | 43.9725  | -122.5793  | 345                 |                              |
| Metanonychus oregonus | Oregon | Lane   | Winberry Creek, FS 1802 1.2 miles E of FS 150, Willamette National Forest                                                 | litter and woody debris and                                                            | 2015-03-28      | J. Starrett, S. DeKarabetian, A. Cabreno, C. Richart | SDSU Arthropods 100%/80% | SD15_001   | 5f, 3mm       | 43.901   | -122.5971  | 405                 |                              |



| Species               | State  | County    | Locality                                                                                           | Ecology                                      | Collection Date | Collectors                                                     | Collection           | Locality #               | # Individuals | Latitude  | Longitude   | Elevation in meters | Elevation in feet (verbatim) |
|-----------------------|--------|-----------|----------------------------------------------------------------------------------------------------|----------------------------------------------|-----------------|----------------------------------------------------------------|----------------------|--------------------------|---------------|-----------|-------------|---------------------|------------------------------|
| Metanonychus oregonus | Oregon | Lincoln   | 0.6 mi NW Elk City, Yaquina River, T11S R10W sec 10                                                | berlese bark, moss, debris                   | 1971-12-20      | EM Benedict                                                    | SDSU Arthropods 80%  | EB-250-260               | 20            | 44.621004 | -123.887165 |                     | 200                          |
| Metanonychus oregonus | Oregon | Lincoln   | 1.4 mi N Nashville, T10S/R8W/S25                                                                   |                                              | 1971-12-20      | E Benedict                                                     | SDSU Arthropods 80%  | EB-261,262,26            | 3             | 44.671351 | -123.609426 |                     | 600                          |
| Metanonychus oregonus | Oregon | Linn      | Swamp Mn. Rd., 3 mi S US Rt. 20, 2 mi S, 2 mi E Cascadia                                           | berlese fir duff                             | 1972-04-29      | EM Benedict                                                    | SDSU Arthropods 80%  | EB648-649                | 2 adults      | 44.358525 | -122.451869 |                     |                              |
| Metanonychus oregonus | Oregon | Linn      | Willamette Nat. For. Rd. 77, _____ Creek, 14(?) mi N, 22 mi E of Sweet Home                        | berlese of duff                              | 1971-04-29      | EM Benedict                                                    | SDSU Arthropods 80%  | EB641                    | 3f            |           |             |                     |                              |
| Metanonychus oregonus | Oregon | Linn      | Yellowbottom Recreation Site, 1(?) mi W of Quartzville Ranger Station, 13 mi N, 18 mi E Sweet Home |                                              | 1972-04-20      | EM Benedict                                                    | SDSU Arthropods 80%  | EB 644-646               | 1m, 3imm      | 44.587045 | -122.373988 |                     |                              |
| Metanonychus oregonus | Oregon | Tillamook | Rest Area, Wilson River Hwy, 1 mi W, 0.5 mi S Lee's Camp                                           | berlese duff, rotted wood                    | 1972-11-04      | EM Benedict                                                    | SDSU Arthropods 80%  | EB1015, 1020, 1018, 1025 | 2m            | 45.584587 | -123.560795 |                     |                              |
| Metanonychus oregonus | Oregon | Benton    | road to Mary's Peak lookout                                                                        | old growth Douglas fir forest / woody debris | 2014-08-14      | M Hedin, E. Ciaccio, A. Cabrero, J. Starrett, S. Derkarabetian | SDSU Arthropods 100% | MCH14_04                 | 1m, 3f        | 44.4962   | -123.5454   |                     | 790                          |

| Species               | State  | County | Locality                                                                         | Ecology                                                                                                                                                | Collection Date | Collectors                                                                  | Collection                     | Locality # | # Individuals | Latitude | Longitude | Elevation in meters | Elevation in feet (verbatim) |
|-----------------------|--------|--------|----------------------------------------------------------------------------------|--------------------------------------------------------------------------------------------------------------------------------------------------------|-----------------|-----------------------------------------------------------------------------|--------------------------------|------------|---------------|----------|-----------|---------------------|------------------------------|
| Metanonychus oregonus | Oregon | Coos   | Golden and Silver Falls State Park, at fork of trails                            | old growth conifer forest / woody debris                                                                                                               | 2014-08-12      | M'Hedin, E.<br>Ciaccio, A.<br>Cabrerro, J.<br>Starrett, S.<br>Derkarabetian | SDSU<br>Arthropods<br>100%     | MCH14_03   | 1f            | 43.4821  | -123.9333 | 90                  |                              |
| Metanonychus oregonus | Oregon | Coos   | Judge Hamilton County Park, Coos Bay Wagon Road 1.4 miles W of Dead Horse Road   | riparian mixed forest adjacent sandstone cliff, Acer macrophyllum, Myrica californica, Ribus spectabilis, Polystichum munitum; woody debris and litter | 2015-03-30      | J. Starrett, S.<br>Derkarabetian,<br>A. Cabrerro, C.<br>Richart             | SDSU<br>Arthropods<br>100%     | SD15_005   | 1m, 2f        | 43.1521  | -123.8116 | 216                 |                              |
| Metanonychus oregonus | Oregon | Coos   | Laverne County Park, NE of Fairview, NE of Coquille                              | old growth doug fir forest / woody debris                                                                                                              | 2014-08-12      | M'Hedin, E.<br>Ciaccio, A.<br>Cabrerro, J.<br>Starrett, S.<br>Derkarabetian | SDSU<br>Arthropods<br>100%/80% | MCH14_03   | 4f            | 43.2602  | -124.0299 | 60                  |                              |
| Metanonychus oregonus | Oregon | Curry  | along Lobster Creek, 1/4 mile N of bridge over Rogue River, E side of creek/road | doug fir forest / woody debris                                                                                                                         | 2014-08-11      | M'Hedin, E.<br>Ciaccio, A.<br>Cabrerro, J.<br>Starrett, S.<br>Derkarabetian | SDSU<br>Arthropods<br>100%     | MCH14_02   | 1m            | 42.5094  | -124.2948 | 80                  |                              |

| Species               | State  | County  | Locality                                                                   | Ecology                                                                                                                                   | Collection Date | Collectors                                                     | Collection                | Locality # | # Individuals | Latitude | Longitude | Elevation in meters | Elevation in feet (verbatim) |
|-----------------------|--------|---------|----------------------------------------------------------------------------|-------------------------------------------------------------------------------------------------------------------------------------------|-----------------|----------------------------------------------------------------|---------------------------|------------|---------------|----------|-----------|---------------------|------------------------------|
| Metanonychus oregonus | Oregon | Curry   | Lobster Creek Rd, 0.6 mi N of North Bank Rogue River Rd                    | Acer macrophyllum, Pseudotsuga menziesii, Umbellularia californica, Alnus rubra, Polystichum munitum forest; leaf litter and woody debris | 2001-04-01      | S. Sitzmann, C. Richart, E. Garcia, A. Schonhofer              | C. Richart 80%            |            | 2m, 5f, 2 imm | 42.5136  | 124.2944  | 79                  |                              |
| Metanonychus oregonus | Oregon | Lane    | East Mapleton Road, along Siuslaw River, N of Bald Mountain, N of Mapleton | disturbed mixed conifer forest / woody debris                                                                                             | 2014-08-13      | M.Hedin, E. Ciaccio, A. Cabrero, J. Starrett, S. Derkarabetian | SDSU Arthropods 100%      | MCH14_03   | 1m, 1f        | 44.0597  | -123.8846 | 10                  |                              |
| Metanonychus oregonus | Oregon | Lane    | Goodman Creek Road, off Hwy 58, NW of Oakridge                             | old growth Douglas fir forest / woody debris                                                                                              | 2014-08-19      | M.Hedin, E. Ciaccio, A. Cabrero, J. Starrett, S. Derkarabetian | SDSU Arthropods 100%/ 80% | MCH14_05   | 4m, 1f        | 43.8429  | -122.6854 | 340                 |                              |
| Metanonychus oregonus | Oregon | Lincoln | Canal Creek, S of Hwy 34, S of Alesa River                                 | decent Douglas fir forest / woody debris                                                                                                  | 2014-08-14      | M.Hedin, E. Ciaccio, A. Cabrero, J. Starrett, S. Derkarabetian | SDSU Arthropods 100%/ 80% | MCH14_04   | 2m, 1f, 1imm  | 44.3718  | -123.9248 | 60                  |                              |
| Metanonychus oregonus | Oregon | Lincoln | Hwy 229, Hwy 229 along Siletz river, AW Jack Morgan County Park            | disturbed Campground forest / sifted litter, log debris                                                                                   | 2014-08-14      | M.Hedin, E. Ciaccio, A. Cabrero, J. Starrett, S. Derkarabetian | SDSU Arthropods 100%/ 80% | MCH14_04   | 2m, 1f, 1imm  | 44.8001  | -123.9048 | 20                  |                              |

| Species               | State  | County    | Locality                                                                          | Ecology                                             | Collection Date | Collectors                                                     | Collection               | Locality # | # Individuals | Latitude  | Longitude   | Elevation in meters | Elevation in feet (verbatim) |
|-----------------------|--------|-----------|-----------------------------------------------------------------------------------|-----------------------------------------------------|-----------------|----------------------------------------------------------------|--------------------------|------------|---------------|-----------|-------------|---------------------|------------------------------|
| Metanonychus oregonus | Oregon | Tillamook | Farmer Creek Road, W of Hwy 101, N of Hebo                                        | decent roadside mixed conifer forest / woody debris | 2014-08-15      | M.Hedin, E. Ciaccio, A. Cabrero, J. Starrett, S. Derkarabetian | SDSU Arthropods 100%/80% | MCH14_04   | 7m, 7f        | 45.2543   | -123.8821   | 80                  |                              |
| Metanonychus oregonus | Oregon | Tillamook | Hwy 6, along Wilson River, near Kansas Creek                                      | roadside Douglas fir forest / woody debris          | 2014-08-16      | M.Hedin, E. Ciaccio, A. Cabrero, J. Starrett, S. Derkarabetian | SDSU Arthropods 100%     | MCH14_04   | 1f            | 45.4914   | -123.6346   | 65                  |                              |
| Metanonychus oregonus | Oregon | Tillamook | road to Elk Creek Campground, off Hwy 6, along South Fork Wilson River            | decent Douglas fir forest / sifted litter           | 2014-08-15      | M.Hedin, E. Ciaccio, A. Cabrero, J. Starrett, S. Derkarabetian | SDSU Arthropods 100%/80% | MCH14_04   | 4m, 3f, 1imm  | 45.6081   | -123.4617   | 270                 |                              |
| Metanonychus setulus  | Oregon | Benton    | Mary's Peak campground, Mary's Peak                                               | under bark (piles) at base surrounding old trees    | 2010-10-01      | S. Derkarabetian, M. McCormack                                 | SDSU Arthropods 100%     | SD10_005   | 2f            | 44.508627 | -123.558219 | 1081                | 3546                         |
| Metanonychus setulus  | Oregon | Benton    | Mary's Peak Road, Mary's Peak, 0.1 miles W of junction w FR 50                    | P. sit forest, bark/bark piles                      | 2010-10-01      | S. Derkarabetian, M. McCormack                                 | SDSU Arthropods 100%/80% | SD10_004   | 1m, 3f, 1imm  | 44.496422 | -123.545722 | 790                 |                              |
| Metanonychus setulus  | Oregon | Benton    | road to Mary's Peak lookout                                                       | old growth Douglas fir forest / woody debris        | 2014-08-14      | M.Hedin, E. Ciaccio, A. Cabrero, J. Starrett, S. Derkarabetian | SDSU Arthropods 100%/80% | MCH14_04   | 16m, 8f, 1imm | 44.4962   | -123.5454   | 790                 |                              |
| Metanonychus setulus  | Oregon | Benton    | small canyon 2.3 mi NW Glenbrook on S. Fork Aisea R. access Road, T14S R6W sec 29 | berlese red alder litter, moss, duff                | 1971-12-01      | EM Benedict                                                    | SDSU Arthropods 80%      | EB-203-204 | 4f            |           |             |                     | 1200                         |

| Species              | State  | County  | Locality                                                                | Ecology                                                                             | Collection Date | Collectors                                                     | Collection                     | Locality #    | # individuals | Latitude | Longitude | Elevation in meters | Elevation in feet (verbatim) |
|----------------------|--------|---------|-------------------------------------------------------------------------|-------------------------------------------------------------------------------------|-----------------|----------------------------------------------------------------|--------------------------------|---------------|---------------|----------|-----------|---------------------|------------------------------|
| Metanonychus setulus | Oregon | Coos    | Golden and Silver Falls State Park, at fork of trails                   | old growth conifer forest / woody debris                                            | 2014-08-12      | M.Hedin, E. Ciaccio, A. Cabrero, J. Starrett, S. DeKarbabetian | SDSU<br>Arthropods<br>100%     | MCH14_03      | 1f            | 43.4821  | -123.9333 | 90                  |                              |
| Metanonychus setulus | Oregon | Coos    | Laveme County Park, NE of Fairview, NE of Coquille                      | old growth doug fir forest / woody debris                                           | 2014-08-12      | M.Hedin, E. Ciaccio, A. Cabrero, J. Starrett, S. DeKarbabetian | SDSU<br>Arthropods<br>100%/80% | MCH14_03      | 1m, 1f        | 43.2602  | -124.0299 | 60                  |                              |
| Metanonychus setulus | Oregon | Curry   | along Sixes River, south of bridge ~2 miles W of Sixes River Campground | disturbed mixed conifer forest / woody debris                                       | 2014-08-12      | M.Hedin, E. Ciaccio, A. Cabrero, J. Starrett, S. DeKarbabetian | SDSU<br>Arthropods<br>100%     | MCH14_03      | 1m, 1f        | 42.8048  | -124.3252 | 60                  |                              |
| Metanonychus setulus | Oregon | Curry   | E of Cape Sebastian State Park, Myers Creek Road                        | disturbed mixed conifer forest / woody debris                                       | 2014-08-11      | M.Hedin, E. Ciaccio, A. Cabrero, J. Starrett, S. DeKarbabetian | SDSU<br>Arthropods<br>100%/80% | MCH14_03      | 1m, 3f        | 42.3316  | -124.4106 | 210                 |                              |
| Metanonychus setulus | Oregon | Curry   | Humburg Mountain State Park, Humburg Mountain Trail                     | mixed conifer forest / woody debris                                                 | 2014-08-11      | M.Hedin, E. Ciaccio, A. Cabrero, J. Starrett, S. DeKarbabetian | SDSU<br>Arthropods<br>100%/80% | MCH14_03      | 2m, 3f, 1imm  | 42.6872  | -124.4356 | 110                 |                              |
| Metanonychus setulus | Oregon | Curry   | North Bank Pistol River Road, 6.5 miles E of US 101                     | <i>Pseudotsuga menziesii</i> , <i>Polystichum</i> / woody debris surrounding stumps | 2015-06-13      | S. DeKarbabetian, A. Cabrero                                   | SDSU<br>Arthropods<br>100%/80% | SD15_015      | 1m, 2f, 8imm  | 42.2763  | -124.3022 | 250                 |                              |
| Metanonychus setulus | Oregon | Douglas | 3.2 mi NE Scottsburg, T22S/R9W/S5                                       |                                                                                     | 1971-12-11      | E Benedict                                                     | SDSU<br>Arthropods<br>80%      | EB-221,222,22 | 1m, 7 adults  |          |           |                     |                              |

| Species              | State  | County  | Locality                                                                   | Ecology                                                                                                                 | Collection Date | Collectors                                                     | Collection                     | Locality # | # Individuals | Latitude | Longitude | Elevation in meters | Elevation in feet (verbatim) |
|----------------------|--------|---------|----------------------------------------------------------------------------|-------------------------------------------------------------------------------------------------------------------------|-----------------|----------------------------------------------------------------|--------------------------------|------------|---------------|----------|-----------|---------------------|------------------------------|
| Metanonychus setulus | Oregon | Douglas | Hwy 38 E of Reedsport, E of Dean Creek, along Umpqua River                 | mked conifer forest / woody debris                                                                                      | 2014-08-13      | M Hedin, E. Ciaccio, A. Cabrero, J. Starrett, S. Derkarabetian | SDSU<br>Arthropods<br>100%/80% | MCH14_03   | 4m, 2f        | 43.6919  | -123.995  | 10                  |                              |
| Metanonychus setulus | Oregon | Lane    | 7 mi E Mapleton, Rt. F Hwy                                                 | berlese alder duff, rotten wood                                                                                         | 1960-09-15      | DR Malcolm                                                     | SDSU<br>Arthropods<br>80%      |            | 1m, 8 adults  |          |           |                     |                              |
| Metanonychus setulus | Oregon | Lane    | Cape Creek Road, E of Hwy 101, E Hecata Head                               | second growth Sitka spruce / woody debris                                                                               | 2014-08-13      | M Hedin, E. Ciaccio, A. Cabrero, J. Starrett, S. Derkarabetian | SDSU<br>Arthropods<br>100%     | MCH14_03   | 2f            | 44.1295  | -124.101  | 40                  |                              |
| Metanonychus setulus | Oregon | Lane    | East Mapleton Road, along Siuslaw River, N of Bald Mountain, N of Mapleton | disturbed mked conifer forest / woody debris                                                                            | 2014-08-13      | M Hedin, E. Ciaccio, A. Cabrero, J. Starrett, S. Derkarabetian | SDSU<br>Arthropods<br>100%     | MCH14_03   | 1m, 1f        | 44.0597  | -123.8846 | 10                  |                              |
| Metanonychus setulus | Oregon | Lane    | Honeyman State Park, off Hwy 101, entrance on W side of Hwy                | old growth mked conifer forest / woody debris                                                                           | 2014-08-13      | M Hedin, E. Ciaccio, A. Cabrero, J. Starrett, S. Derkarabetian | SDSU<br>Arthropods<br>100%/80% | MCH14_03   | 3m, 1f        | 43.9302  | -124.1086 | 30                  |                              |
| Metanonychus setulus | Oregon | Lincoln | 0.6 mi NW Elk City, Yaquina River, T1S/R10W/S10                            |                                                                                                                         | 1971-12-20      | E Benedict                                                     | SDSU<br>Arthropods<br>80%      | EB260      | 12 adults     |          |           |                     | 200                          |
| Metanonychus setulus | Oregon | Lincoln | Beaver Creek Road (FR 31), 1 mile W of Horse Creek Road (FR 50)            | <i>Pseudotsuga menziesii</i> ,<br><i>Picea sitchensis</i> ,<br><i>Polystichum</i> / woody debris surrounding old stumps | 2015-06-13      | S. Derkarabetian, A. Cabrero                                   | SDSU<br>Arthropods<br>100%/80% | SD15_016   | 1f, 5imm      | 44.5312  | -123.9296 | 166                 |                              |

| Species                      | State      | County    | Locality                                    | Ecology                                  | Collection Date | Collectors                                                     | Collection                     | Locality # | # individuals | Latitude | Longitude | Elevation in meters | Elevation in feet (verbatim) |                     |
|------------------------------|------------|-----------|---------------------------------------------|------------------------------------------|-----------------|----------------------------------------------------------------|--------------------------------|------------|---------------|----------|-----------|---------------------|------------------------------|---------------------|
| Metanonychus setulus         | Oregon     | Lincoln   | Canal Creek, S of Hwy 34, S of Aalsea River | decent Douglas fir forest / woody debris | 2014-08-14      | M.Hedin, E. Ciaccio, A. Cabrero, J. Starrett, S. Derkarabetian | SDSU Anthropods 100%/80%       | MCH14_04   | 2m, 2f, 2imm  | 44.3718  | -123.9248 | 60                  |                              |                     |
| Metanonychus setulus         | Oregon     | Lincoln   | Hwy 20, Hwy 20, NW of Toledo                | disturbed roadside forest / woody debris | 2014-08-14      | M.Hedin, E. Ciaccio, A. Cabrero, J. Starrett, S. Derkarabetian | SDSU Anthropods 100%/80%       | MCH14_04   | 3m, 3f        | 44.676   | -123.8741 | 50                  |                              |                     |
| Type specimens               |            |           |                                             |                                          |                 |                                                                |                                |            |               |          |           |                     |                              |                     |
| Metanonychus setulus obrieni | California | Del Norte | Fort Dick                                   | Berlese - Redwood litter                 | 1966-07-02      | C.W. O'Brien                                                   | California Academy of Sciences |            | 1m, 1f        |          |           |                     |                              | HOLOTYPE & ALLOTYPE |
| Metanonychus setulus obrieni | California | Del Norte | Fort Dick                                   | Berlese - Redwood litter                 | 1966-07-02      | C.W. O'Brien                                                   | California Academy of Sciences |            | 2m, 1f        |          |           |                     |                              | TOPOTYPES           |
